# Supplementary material
Source: PubMed Central journal article supplement (PMC5816186)
Supplement: pnas.1717383115.sapp.pdf [file pnas.1717383115.sapp.pdf]

## Inventory of the Supplementary Information

- Figure S1. Full-length RidL and RidL-N, but not RidL-C, bind to PtdIns(3)P.
- Figure S2. Cellular localization of RidL-FL, RidL-N, and RidL-C.
- Figure S3. Stereo view of RidL loop with a composite Simulated Annealing omit map at 2.5 Å resolution and contoured at  $1\sigma$ .
- Figure S4. Sequence comparison of RidL from different *Legionella* species.
- Figure S5. Identification and characterization of PtdIns(3)P binding residues in RidL-N.
- Figure S6. VARP and TBC1d5 recognize VPS29 through similar modes.
- Figure S7. Interaction between TBC1d5 and VPS29 proteins.
- Table S1. Crystallography Data Collection and Refinement Statistics.
- Table S2. DNA Constructs Used in this Study.
- Table S3. Summary of Antibodies Used in this Study

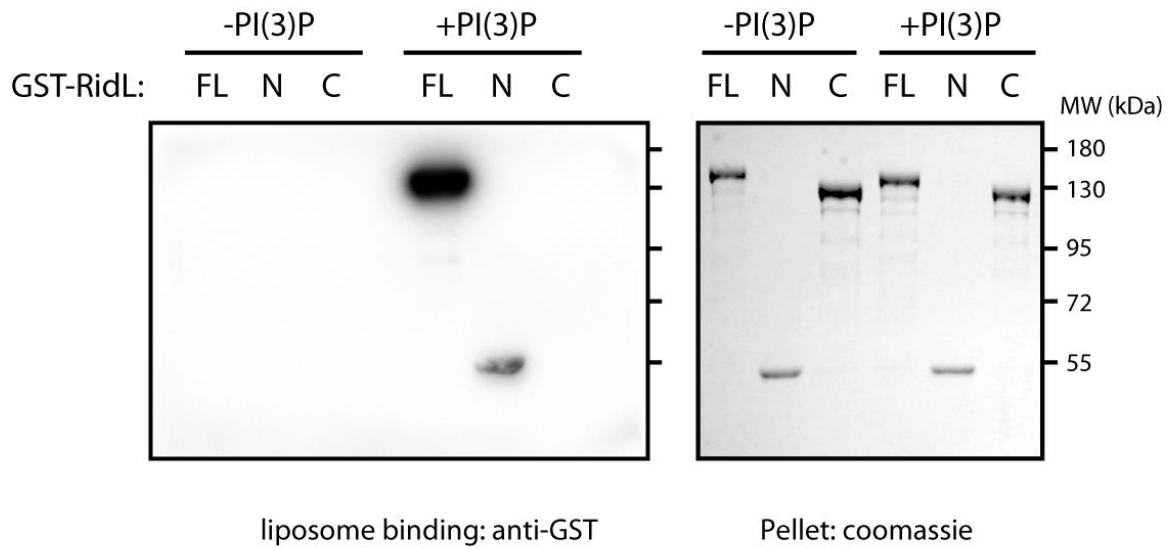

Figure S1

**Figure S1.** Full-length RidL and RidL-N, but not RidL-C, bind to PtdIns(3)P.

Left: Proteins associated with PtdIns(3)P-containing or PtdIns(3)P-free liposomes were immunoblotted with anti-GST antibody. Right: GST-fusion proteins in pellet stained by coomassie blue.

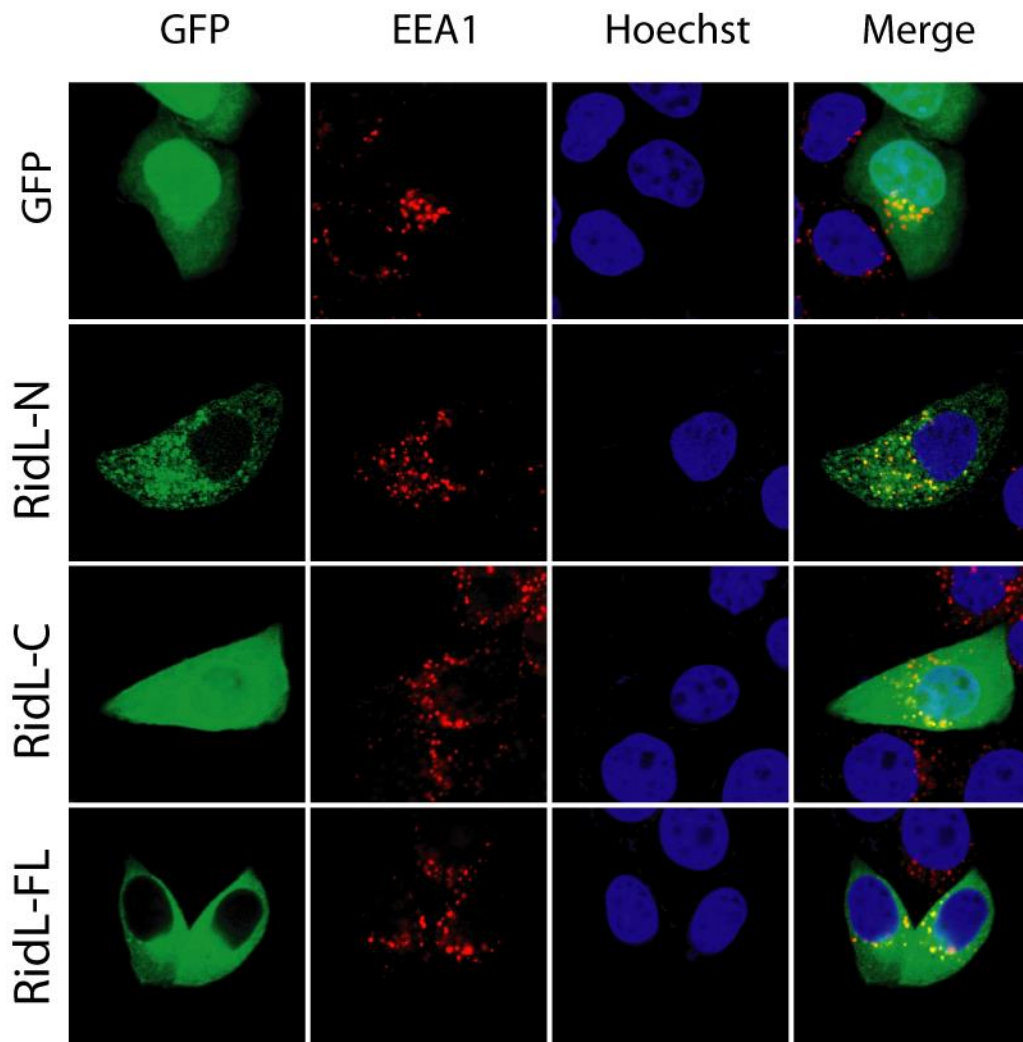

Figure S2

**Figure S2.** Cellular localization of RidL-FL, RidL-N, and RidL-C. HeLa cells were transfected with GFP, or GFP-RidL-FL, RidL-N, RidL-C (green), and then fixed and labeled with anti-EEA1 (red) antibody.

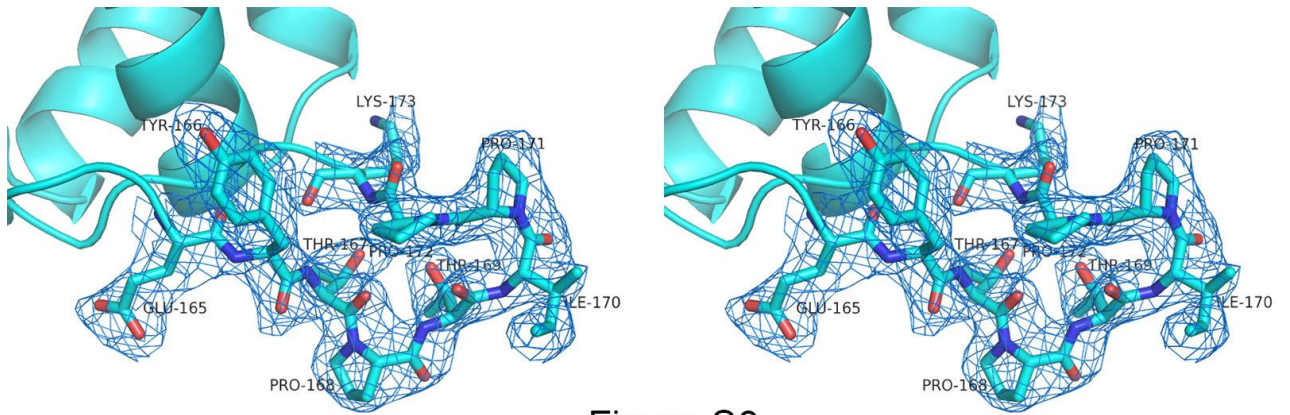

Figure S3

**Figure S3.** Stereo view of the RidL loop with a composite Simulated Annealing omit map at 2.5 Å resolution and contoured at  $1\sigma$ .

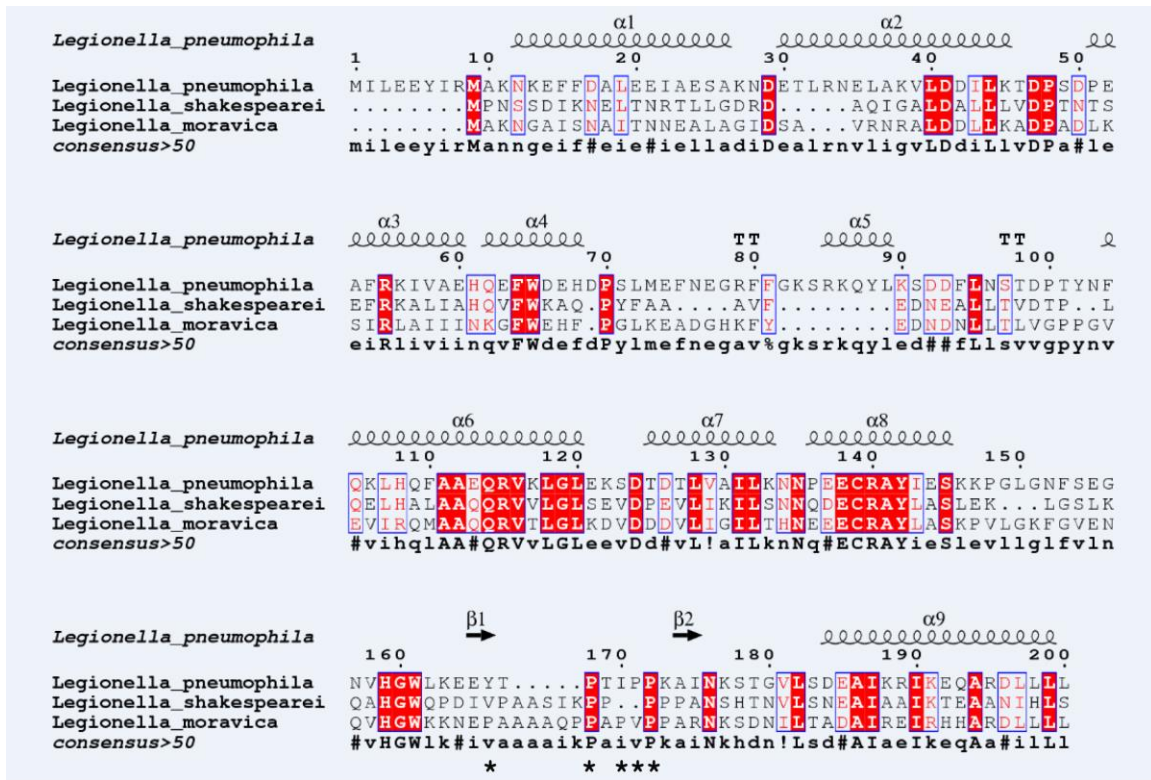

Figure S4

**Figure S4.** Sequence comparison of RidL from different *Legionella* species. *L. moravica* or *L. shakspareii* RidL proteins are the two closest homologs to *L. pneumophila* RidL. Sequence alignments were performed with ClustalW, with protein secondary structure listed above and consensus sequence listed below. The residues that interact with VPS29 are labeled with a “\*” at the bottom of alignment.

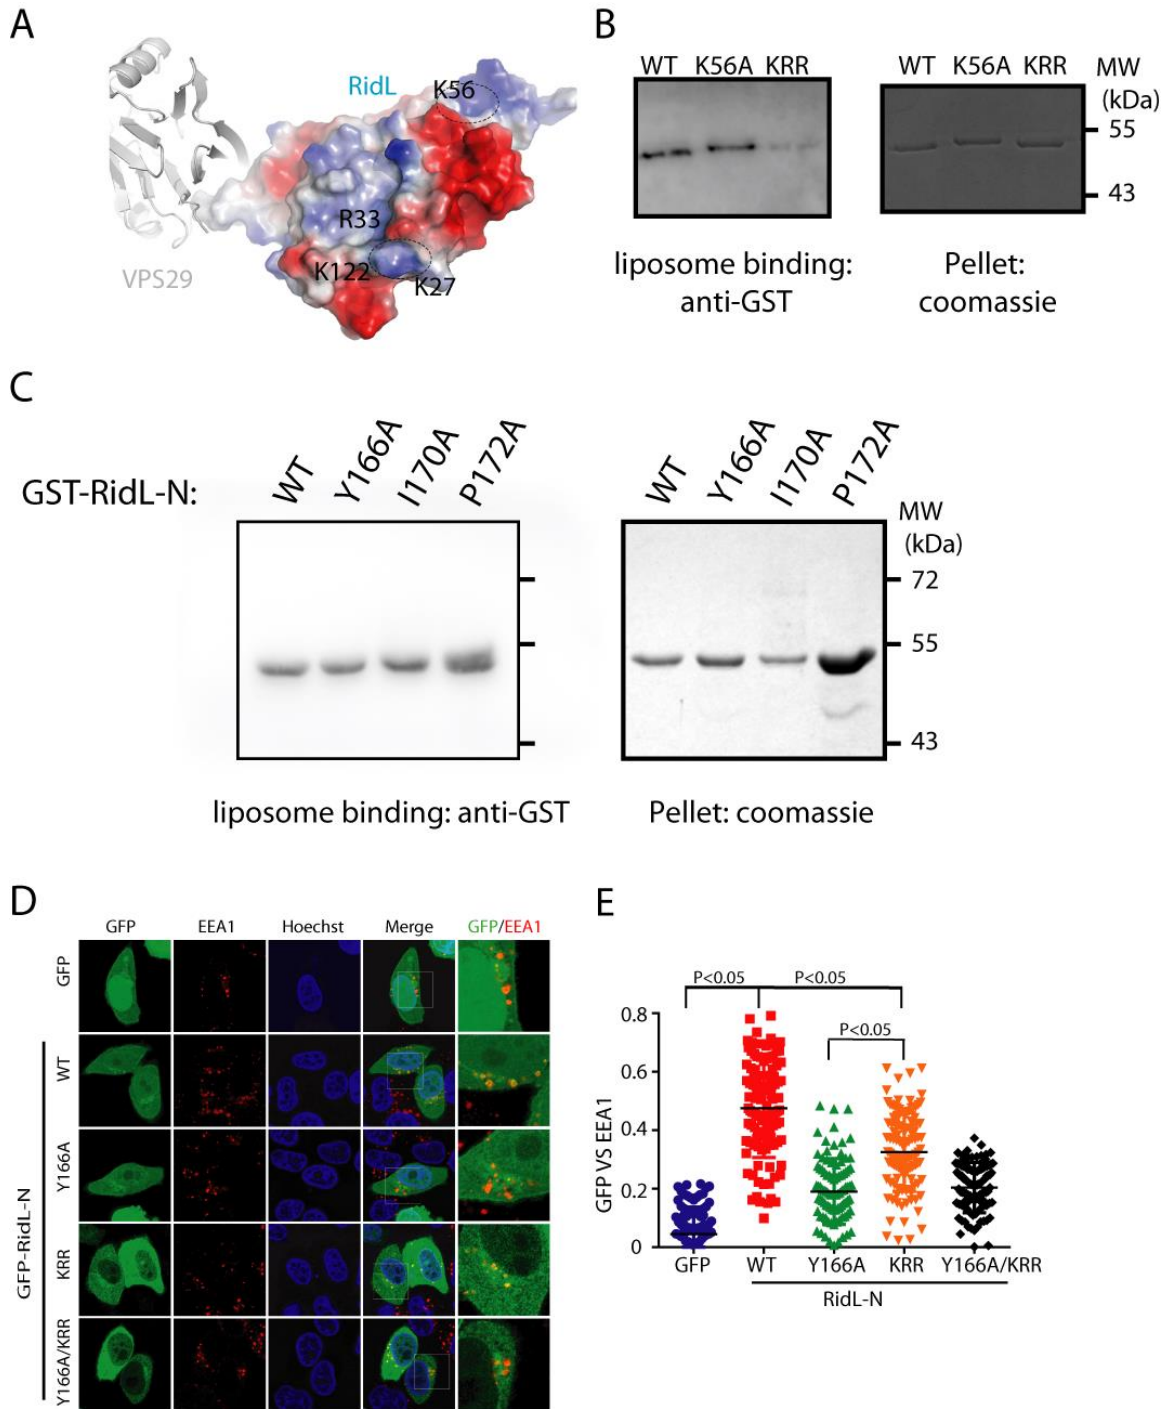

Figure S5

**Figure S5.** Identification and characterization of PtdIns(3)P binding residues in RidL-N.

(A) VPS29-RidL complex structure highlighting two positively charged surfaces (circled) on RidL that are distant from the VPS29-binding site.

(B) PtdIns(3)P-containing liposome flotation assay. Left: liposome-bound samples were probed with anti-GST antibody; right: GST-fusion proteins in pellet stained by coomassie blue.

(C) VPS29-interacting deficient RidL mutants binds to PtdIns(3)P-containing liposome similar to RidL WT. Left: liposome-bound samples were probed with anti-GST antibody; right: GST-fusion proteins in pellet stained by coomassie blue.

(D) HeLa cells were transfected with GFP, or GFP-RidL-N WT, Y166A, KRR, Y166A/KRR (green), and then fixed and labeled with anti-EEA1 (red) antibody.

(E) Quantitation of GFP colocalization with EEA1 in cells in (c). Each dot represents Pearson's correlation coefficients from one cell. P values shown are the result of one-way ANOVA, post hoc Tukey's test.



A

```
Human_TBC1d5 132 GQQDLMINNPLSQDEGSLWNKFFQDKE 158
Human_VARP   424 KDTVQKMCHPLCFCDDCEKLVSGRLND 450
Human_VARP   704 SAADEFECHPLCQCPKCAPAQKRLAKV 730
```

B

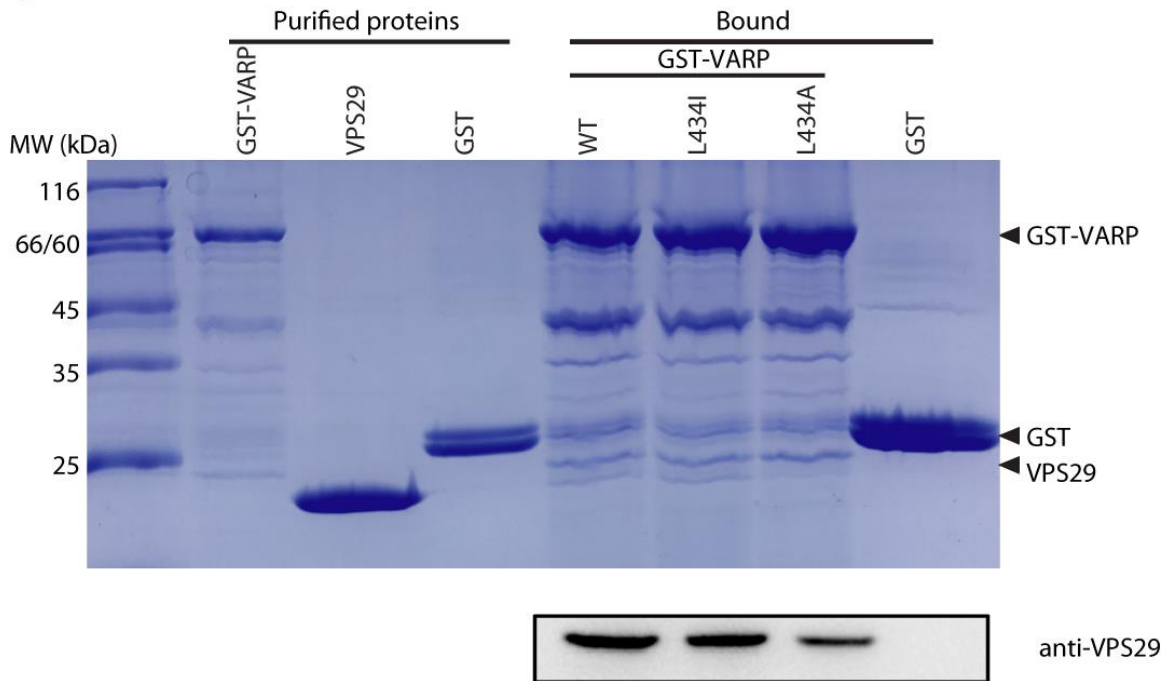

Figure S6

**Figure S6.** VARP and TBC1d5 recognize VPS29 through similar modes.

(A) Sequence comparison of Ins1 of TBC1d5 and two cysteine-rich motifs of VARP.

Conserved residues are highlighted in machaccino. The leucine residue mutated in the pull-down experiment in (B) is labeled with a black triangles on top.

(B) GST-VARP (aa1-450) WT, mutants or GST pull-down of purified VPS29. Shown are a coomassie blue stained SDS-PAGE gel of purified proeins and bound samples (top),



and immunoblot using anti-VPS29 antibody for the same sample (bottom). The GST-VARP samples contained multiple degraded proteins whose sizes range from that of GST-VARP to that of GST.

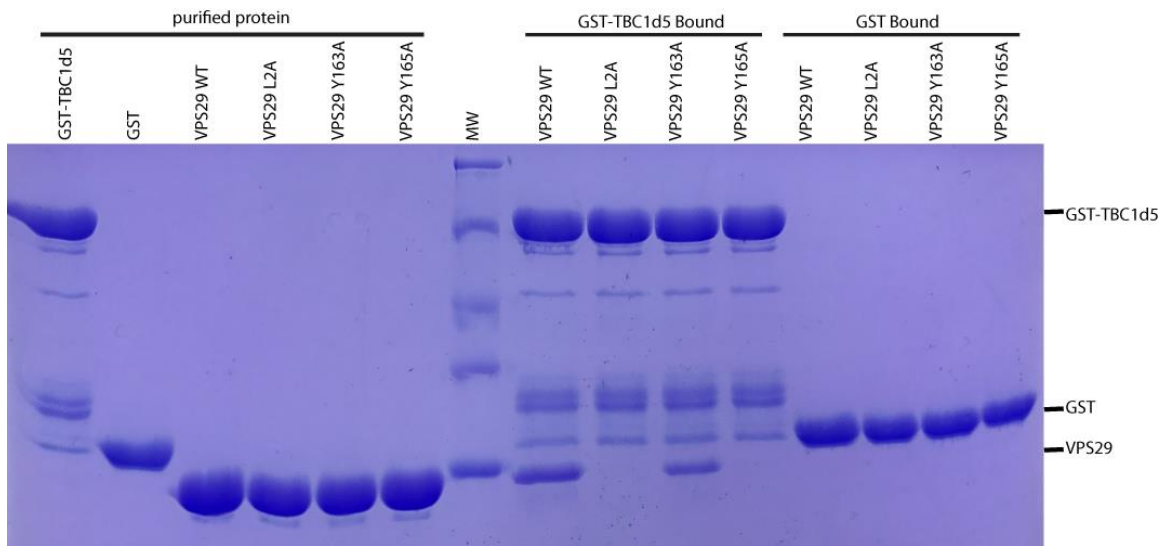

Figure S7

Figure S7. Interaction between TBC1d5 and VPS29 proteins.

GST-TBC1d5 (aa1-419) or GST pull-down of purified VPS29 WT or mutants. Shown are a coomassie blue stained SDS-PAGE gel of purified proteins and bound samples (top).

**Table S1. Crystallography Data Collection and Refinement Statistics.**

|                                                       | <i>VPS29:RidL</i> <sup>5-205</sup>                                          |
|-------------------------------------------------------|-----------------------------------------------------------------------------|
| Cell axial lengths (Å)                                | $a=44.31, b=82.05, c=87.33$<br>$\alpha=101.73, \beta=104.26, \gamma=104.77$ |
| Spacegroup                                            | P <sub>1</sub>                                                              |
| <b>Data collection</b>                                |                                                                             |
| Resolution range (Å)                                  | 50.00-2.50 (2.54-2.50)                                                      |
| Number of observed reflections                        | 139107 (6728)                                                               |
| Number of unique reflections                          | 36022 (1764)                                                                |
| Completeness (%)                                      | 96.7 (97.0)                                                                 |
| Redundancy                                            | 3.7 (3.7)                                                                   |
| Rmerge                                                | 0.106 (0.891)                                                               |
| Highest shell CC1/2                                   | 0.722                                                                       |
| Mean $I/I_{\sigma}$                                   | 14.4 (1.9)                                                                  |
| Solvent content (%)                                   | 62.6                                                                        |
| <b>Refinement</b>                                     |                                                                             |
| Resolution range (Å)                                  | 50.00-2.50 (2.57-2.50)                                                      |
| Number of working reflections                         | 30261 (405)                                                                 |
| Number of test reflections                            | 1602 (23)                                                                   |
| R <sub>work</sub> <sup>a</sup> (no. of reflections)   | 0.188 (0.232)                                                               |
| R <sub>free</sub> <sup>b</sup> (no. of reflections)   | 0.224 (0.326)                                                               |
| R.m.s. deviation bond lengths (Å)                     | 0.010                                                                       |
| R.m.s. deviation bond angles (°)                      | 1.406                                                                       |
| <b>Average B-factors (Å<sup>2</sup>) (# of atoms)</b> |                                                                             |
| VPS29 atoms                                           | 47.5 (2938)                                                                 |
| RidL atoms                                            | 60.9 (3209)                                                                 |
| Waters atoms                                          | 43.1 (226)                                                                  |
| <b>Ramachandran plot</b>                              |                                                                             |
| Most favored regions (%)                              | 90.3                                                                        |
| Allowed regions (%)                                   | 8.8                                                                         |
| General allowed regions (%)                           | 0.3                                                                         |
| Disallowed regions (%)                                | 0.6                                                                         |

R<sub>work</sub><sup>b</sup> =  $\sum |F_o - F_c| / |F_o|$ , where F<sub>c</sub> and F<sub>o</sub> are the calculated and observed structure factor amplitudes, respectively  
R<sub>free</sub><sup>c</sup> calculated as for R<sub>work</sub> but for 5.0% of the total reflections chosen at random and omitted from refinement for all data sets  
# values in the parenthesis is information from highest resolution shell.

**Table S2. DNA Constructs Used in this Study.**

| Construct name                                   | Source or reference |
|--------------------------------------------------|---------------------|
| pEGFP-C1                                         | Clontech #6084-1    |
| pEGFP-C1-RidL                                    | This paper          |
| pEGFP-C1-RidL-N (aa1-200)                        | This paper          |
| pEGFP-C1-RidL-N-Y166A                            | This paper          |
| pEGFP-C1-RidL-N- I170A                           | This paper          |
| pEGFP-C1-RidL-N-P172A                            | This paper          |
| pEGFP-C1-RidL-C (aa201-C)                        | This paper          |
| pEGFP-C1-RidL-N-KRR                              | This paper          |
| pEGFP-C1-RidL-N-Y166A/KRR                        | This paper          |
| pGEX-4T-1-RidL                                   | This paper          |
| pGEX-4T-1-RidL-N (aa1-200)                       | This paper          |
| pGEX-4T-1-RidL-C (aa201-C)                       | This paper          |
| pGEX-4T-1-RidL-N Y166A                           | This paper          |
| pGEX-4T-1-RidL-N P168A                           | This paper          |
| pGEX-4T-1-RidL-N I170A                           | This paper          |
| pGEX-4T-1-RidL-N I170E                           | This paper          |
| pGEX-4T-1-RidL-N I170L                           | This paper          |
| pGEX-4T-1-RidL-N I170W                           | This paper          |
| pGEX-4T-1-RidL-N P171A                           | This paper          |
| pGEX-4T-1-RidL-N P172A                           | This paper          |
| pGEX-4T-1-RidL-N-NKS (N176L/K177D/S178A)         | This paper          |
| pGEX-4T-1-loop <sup>LP</sup> (aa160-180)         | This paper          |
| pGEX-4T-1-RidL <sup>LM</sup>                     | This paper          |
| pGEX-4T-1-RidL <sup>LS</sup>                     | This paper          |
| pGEX-4T-1-RidL <sup>LS</sup> -loop <sup>LP</sup> | This paper          |

|                                     |                                     |
|-------------------------------------|-------------------------------------|
| pCDF-1b-VPS29                       | (Jia et al., 2012)                  |
| pCDF-1b-VPS29 L2A                   | This paper                          |
| pCDF-1b-VPS29 L25A                  | This paper                          |
| pCDF-1b-VPS29 K30A                  | This paper                          |
| pCDF-1b-VPS29 Y163A                 | This paper                          |
| pCDF-1b-VPS29 Y165A                 | This paper                          |
| pCDF-1b-VPS29 R176A                 | This paper                          |
| pCDF-1b-VPS29 K56A                  | This paper                          |
| pCDF-1b-VPS29 KKR (K27A/R33A/K122A) | This paper                          |
| pGEX-4T-1-VPS35                     | (Jia et al., 2012)                  |
| pCDF-1b-VPS26                       | (Jia et al., 2012)                  |
| pGEX-4T-1-TBC1D5                    | (Jia et al., 2016)                  |
| pGEX-4T-1-VARP (aa1-450)            | (Hesketh et al., 2014) ; this paper |
| pGEX-4T-1-VARP-L434I                | This paper                          |
| pGEX-4T-1-VARP-L434A                | This paper                          |
| pSTxB                               | (Liu et al., 2012)                  |

**Table S3. Summary of Antibodies Used in this Study**

| Antibody                                          | SOURCE                                          | Catalog #   |
|---------------------------------------------------|-------------------------------------------------|-------------|
| VPS35                                             | Gift from Dr. Dan Billadeau; (Jia et al., 2016) | N/A         |
| VPS29                                             | GeneTex                                         | GTX104768   |
| EEA1                                              | BD Biosciences                                  | 610457      |
| TBC1D5                                            | PTG                                             | 17078-1-ap  |
| TGN46                                             | abcam                                           | ab50595     |
| STxB                                              | Gift from Dr. Guihua Tai; (Liu et al., 2012)    | N/A         |
| GST                                               | PTG                                             | 66001-1-Ig  |
| Goat anti-rabbit IgG-HRP                          | Santa Cruz                                      | sc-2004     |
| TRITC affininipure goat anti-mouse IgG            | Jackson ImmunoResearch                          | 115-025-003 |
| TRITC affininipure goat anti-rabbit IgG           | Jackson ImmunoResearch                          | 111-025-003 |
| Alexa Fluor 647 affininipure goat anti-rabbit IgG | Jackson ImmunoResearch                          | 111-605-003 |
